## Ecosystem tipping points in an evolving world

Vasilis Dakos<sup>1</sup>, Blake Matthews<sup>2</sup>, Andrew Hendry<sup>3</sup>, Jonathan Levine<sup>4</sup>, Nicolas Loeuille<sup>5</sup>, Jon Norberg<sup>6</sup>, Patrik Nosil<sup>7</sup>, Marten Scheffer<sup>8</sup>, and Luc De Meester<sup>9</sup>

<sup>1</sup> Institute des Sciences de l'Evolution, Université de Montpellier, CNRS, IRD, EPHE, Montpellier, France

<sup>2</sup> Eawag, Department of Aquatic Ecology, Center for Ecology, Evolution and Biogeochemistry, Switzerland

<sup>3</sup> Redpath Museum & Dept. of Biology, McGill University, 859 Sherbrooke St. W, Montreal, QC H3A 0C4, Canada

<sup>4</sup> Institute of Integrative Biology, ETH Zurich, 8092 Zurich, Switzerland

<sup>5</sup> Sorbonne Université, UPMC Univ Paris 06, CNRS, IRD, INRA, Université Paris Diderot, Institute of Ecology and Environmental Sciences (UMR7618), 7 quai St Bernard, Paris 75005, France

<sup>6</sup> Stockholm Resilience Centre, Stockholm University, Stockholm, Sweden

<sup>7</sup> Department of Animal and Plant Sciences, University of Sheffield, UK

<sup>8</sup> Department of Environmental Sciences, Aquatic Ecology and Water Quality Management Group, Wageningen University Wageningen, The Netherlands

<sup>9</sup> Laboratory of Aquatic Ecology, Evolution and Conservation, KU Leuven, Deberiotstraat 32, B-3000 Leuven, Belgium

**Corresponding author:** Vasilis Dakos [vasilis.dakos@umontpellier.fr](mailto:vasilis.dakos@umontpellier.fr), Blake Matthews

[blake.matthews@eawag.ch](mailto:blake.matthews@eawag.ch)

25 **Abstract**

26 There is growing concern over tipping points arising in ecosystems due to the crossing of  
27 environmental thresholds. Tipping points lead to strong and possibly irreversible shifts between  
28 alternative ecosystem states incurring high societal costs. Traits are central to the feedbacks  
29 that maintain alternative ecosystem states, as they govern the responses of populations to  
30 environmental change that could stabilize or destabilize ecosystem states. However, we know  
31 little about how evolutionary changes in trait distributions over time affect the occurrence of  
32 tipping points, and even less about how big scale ecological shifts reciprocally interact with trait  
33 dynamics. We argue that interactions between ecological and evolutionary processes should be  
34 taken into account for understanding the balance of feedbacks governing tipping points in  
35 nature.

36

37 **keywords:** resilience, evo-to-eco, contemporary evolution, catastrophic shifts, eco-evolutionary  
38 dynamics, traits

39

## 40 **Tipping points in an evolving world**

41 Tipping points mark the abrupt shift between contrasting ecosystem states (broadly termed  
42 regime shifts) when environmental conditions cross specific thresholds (Box 1). Prominent  
43 examples are the shift of shallow lakes from a clear to a turbid water state (Scheffer et al.  
44 1993), or the collapse of vegetation to a desert state in drylands (Reynolds et al. 2007). Societal  
45 stakes associated with tipping points in natural ecosystems can be high and there is great  
46 emphasis on the mechanisms that trigger them (Oliver et al. 2015) and the possible ways to  
47 detect and avoid them (Scheffer et al. 2009). Currently, however, tipping point theory lacks an  
48 evolutionary perspective, and this might limit our understanding of the occurrence, timing, and  
49 abruptness of shifts between states (Figure 1). Here we argue that both trait variation and  
50 evolution are important for understanding ecosystem dynamics in the vicinity of tipping points.

51  
52 Developing a trait-based evolutionary perspective about tipping points in ecosystems is  
53 warranted by the growing evidence that changes in standing levels of trait variation and  
54 contemporary trait evolution are important drivers of ecological dynamics (eg (Saccheri and  
55 Hanski 2006; Kinnison and Hairston 2007)), influencing population dynamics (Yoshida et al.  
56 2003), shaping the structure of species interactions and composition at the community (Pantel  
57 et al. 2015), or at metacommunity level (Farkas et al. 2013). Such ecological effects of evolution  
58 also extend to ecosystem functioning (Norberg et al. 2001; Matthews et al. 2011; Hendry 2017),  
59 by modifying material fluxes (De Mazancourt et al. 1998), primary production (Gravel et al.  
60 2011), nutrient recycling (Loeuille et al. 2002), and decomposition (Boudsocq et al. 2012). Thus,  
61 it is reasonable to expect that trait distributions could be important for ecological tipping points  
62 by affecting response diversity in an ecosystem; that is variation in the sensitivity among  
63 species, populations, or individuals to environmental stress (Elmqvist et al. 2003). This  
64 sensitivity underlies the response capacity of communities to stress (Vellend and Geber 2005),  
65 such that trait change could affect the resilience of entire ecosystems to stress (Mori et al.  
66 2013) and their probability of tipping to a different state.

67

68 Ecosystem resilience can be affected by variation in traits (Norberg et al. 2001; Matthews et al.  
69 2011) underlying the performance and fitness of organisms in a given environmental state (i.e.  
70 response traits), or those causing direct or indirect effects on the environmental state (i.e.  
71 effect traits) (Table 1). The distribution of such response and effect traits can vary due to  
72 phenotypic plasticity or evolutionary trait change, and distinguishing between these  
73 mechanisms can be important for understanding the temporal dynamics of trait change in  
74 general (Cortez 2011), and of tipping points in particular. Phenotypic plasticity, where  
75 genotypes exhibit different phenotypes in different environments, is a relevant source of trait  
76 variation, particularly when the phenotypic changes relate to the capacity of organisms to  
77 respond to stress. However evolutionary responses to stress depend on heritable trait variation  
78 in a population (Hansen et al. 2012), which can originate from novel variants due to mutation  
79 (Nei 2007), recombination (Ortiz-Barrientos et al. 2016), or gene flow among populations and  
80 species (Seehausen 2004). Below, we do not *a priori* distinguish between the genetic versus  
81 plastic sources of trait distributions (although we comment on their differences), but focus on  
82 how trait variation and trait change over time can influence ecosystem tipping points in a  
83 generic way. We do this using a graphical approach where we illustrate how trait changes might  
84 modify the collapse and recovery trajectories of ecosystems along an environmental gradient.

85

### 86 ***Trait variation could affect the probability of tipping points***

87 Differences in the amount of trait variation in populations could affect their response capacity  
88 to stress. In general, we predict that high trait variation may decrease the probability of tipping  
89 points turning ecosystem responses to non-catastrophic. A decrease in the probability of  
90 tipping events occurs because standing trait variation allows for portfolio effects that introduce  
91 strong heterogeneity in population processes, interactions, and responses (Bolnick et al. 2011)  
92 buffering population dynamics (Schindler et al. 2010). Such heterogeneity can be enhanced by  
93 Jensen's inequality (Bolnick et al. 2011), where variation around the mean of a trait can affect  
94 the response of an ecological interaction or an ecological process in function of the nonlinear  
95 relationship between the trait and its effect (Ruel and Ayres 1999). This effect can be clearly  
96 illustrated in a toy model describing shifts in the case of shallow lakes (Figure I in Box 1). Here,

97 changing the amount of variation in the macrophytes' response trait to turbidity can increase or  
98 decrease the probability of a tipping point response. Under high levels of variation the  
99 transition from the clear to the turbid water state can even become non-catastrophic with no  
100 alternative states (Figure 1).

101

102

### 103 ***Trait change could delay a tipping point***

104 As introduced in the previous paragraph, trait variation simply means that some resistant  
105 phenotypes are present. However, trait variation could also facilitate trait changes. On top of  
106 that, trait changes might be fueled by *denovo* mutation and phenotypic plasticity. In  
107 ecosystems where stress gradients bring them closer to tipping points, trait changes could  
108 potentially delay tipping to the alternative state (Figure 2a). This resonates with the idea of  
109 evolutionary rescue (Gomulkiewicz and Holt 1995), the difference being that there is no rescue,  
110 but rather only a delay in the collapse of the system by shifting the threshold at which the  
111 collapse occurs at a higher stress level (Figure 2b). For instance, in the case of a shallow lake  
112 turning turbid due to eutrophication (Box 1), aquatic macrophytes might delay the transition to  
113 a higher threshold level of nutrients because of contemporary changes in traits that convey  
114 tolerance to shading (Table 1).

115

### 116 ***Trait change could lead earlier to a tipping point***

117 Trait change may not always buffer populations from environmental changes, but could also  
118 contribute to an increased risk of ecosystem collapse (Figure 2c, d). For example, environmental  
119 stress could impose directional selection on a trait in a given species or group of species that  
120 brings the system closer to tipping to an alternative ecological state (Dieckmann and Ferriere  
121 2004; Rankin and Lopez-Sepulcre 2005). This is similar to evolutionary collapses or evolutionary  
122 suicide as defined in evolutionary biology (Ferriere and Legendre 2013), but here the collapse  
123 occurs at the scale of a whole ecosystem. Empirical examples of trait evolution leading to  
124 population collapse come mostly from fish populations under harvesting (Rankin and Lopez-  
125 Sepulcre 2005; Walsh et al. 2006). For example, it has been shown how fishing pressure has led

126 to the early maturation of Atlantic cod populations (Olsen et al. 2004) that is associated with  
127 lower reproductive output and irregular recruitment dynamics that could have increased the  
128 chance of stochastic extinction and the cod collapse in the 1990s. Evolutionary suicide might  
129 lead to an ecosystem-level collapse in the case of drylands (Kéfi et al. 2008), where under  
130 increased aridity adaptive evolution can favor local facilitation among neighboring plants for  
131 resisting higher aridity. Whether evolution leads to a buffering effect depends on the seed  
132 dispersal strategy of the dominant vegetation type. In systems characterized by long-distance  
133 dispersal, evolution may actually enhance the collapse of the vegetation to a desert state due  
134 to the invasion of non-facilitating mutants. In our shallow lake example, macrophytes at  
135 intermediate turbidities might respond by growing longer stems with fewer leaves in order to  
136 reach well-lit surface waters and avoid shading. If this, however, results in less photosynthetic  
137 activity and less capacity to remove nutrients from the water column, it might reduce the  
138 capacity to outgrow the algae and maintain a clear water state.

139

#### 140 ***Trait change could affect the path of recovery***

141 Changes in trait distributions over time may also affect the recovery trajectory of an ecosystem  
142 back to its previous state and the range of hysteresis, i.e. the lag in the threshold of the  
143 environmental driver at which recovery to the pre-collapsed state occurs (see Box 1 and Box 4  
144 (Glossary)). The most obvious example is the case where trait change delays a tipping point  
145 (Figure 3). In many cases, this delay will not necessarily result in an equally early recovery,  
146 which implies that hysteresis in the system will increase. This example illustrates that tipping  
147 points and hysteresis are the flip side of mechanisms buffering the stable states: if evolution or  
148 phenotypic plasticity buffers the system against environmental change, this can not only delay  
149 reaching a tipping point but it may also result in stronger hysteresis.

150

151 Another possibility is that evolutionary processes in the deteriorated state might cause the  
152 collapsed species to lose the genetic variation necessary for recovery to, and high fitness in, the  
153 alternate state (Murray et al. 2017). In a laboratory experiment, (Walsh et al. 2006) found that  
154 overharvested fish populations failed to recover even after reducing fishing pressure due to

155 genetic changes in life history traits. This may result in a delay in recovery, or no recovery at all.  
156 The opposite scenario is also possible. Trait changes may accelerate recovery and reduce  
157 hysteresis (Figure 3). This may happen if, after the collapse, a highly adaptive phenotype is  
158 selected for facilitating recovery only at a small reduction of stress. For example, after the  
159 collapse of a phytoplankton population due to light stress in the laboratory, recovery took place  
160 earlier than expected due to a (probably plastic) adaptive photo-acclimation response (Faassen  
161 et al. 2015). If after the collapse a different phenotype is selected for, or if there is recovery of  
162 the lost phenotypic variation (e.g. due to immigration), it may even be possible that the  
163 recovery pattern becomes non-catastrophic.  
164 In all cases highlighted in the previous paragraphs, it is uncertain whether the ecosystem will  
165 actually recover to the exact same state as before the collapse (Figure 3). The degree to which  
166 complete recovery happens might probably depend on the trait that changes. It is one of the  
167 outstanding questions whether trait changes that impact the probability of tipping also impact  
168 recovery trajectories (Box 3).

169

### 170 ***Phenotypic plasticity, evolution and tipping points***

171 There are more possibilities for the collapse and recovery paths of the ecosystem state than the  
172 ones we highlighted here. All will depend on the mechanisms of phenotypic change and it  
173 requires both theoretical and empirical work to understand the most probable outcomes on  
174 tipping point responses that would result either from evolution, from phenotypic plasticity, or  
175 from their combined effect, including even the evolution of phenotypic plasticity. One reason  
176 why the distinction between phenotypic plasticity and evolutionary trait change is important is  
177 that the rates at which these processes operate tend to differ, with phenotypic plasticity being  
178 generally faster than evolutionary change. Conversely, phenotypic plasticity is often limited in  
179 amplitude, and evolutionary trait change might extend the range to which tipping points and  
180 hysteresis can be impacted. Importantly, trait change due to evolution also has an intrinsic  
181 impact on the population genetic structure that entails a legacy that may impact recovery (e.g.  
182 case of genetic erosion or a trait change that is adaptive in one stable state but maladaptive in

183 the other state), whereas trait change mediated by phenotypic plasticity may impact tipping  
184 points without a legacy effect if the trait change is reversible.

185

## 186 **Testing the effects of phenotypic change on tipping point responses**

### 187 ***Integrating evolutionary dynamics in models of ecological tipping points***

188 Coupling models on evolutionary dynamics with models of ecological bistability can offer a  
189 better understanding about when genetic trait change can affect tipping point responses. The  
190 adaptive dynamics framework - that assumes limited mutation and the separation of ecological  
191 and evolutionary timescales - has been used to study how evolution may incur evolutionary  
192 collapse and suicide (Dieckmann and Ferriere 2004). Under rapid environmental change, a  
193 quantitative genetics approach (Abrams 2005) is useful for studying how contemporary genetic  
194 trait change may lead to evolutionary rescue. Both modelling frameworks can be adapted for  
195 studying how trait changes might affect well-understood models with ecological tipping points  
196 under changing environmental conditions. For instance, we could relax the assumption on the  
197 separation of timescales and the assumption of weak selection of each framework,  
198 respectively, and apply them to models with tipping points. Or one could develop hybrid  
199 models that can account simultaneously for selection gradients, while also accounting for  
200 genetic drift and demographic stochasticity that dominate the recovery trajectory of the  
201 collapsed state. We can then combine these models with recently developed methods that  
202 measure the relative impact of evolutionary vs ecological dynamics on stability (Patel et al.  
203 2016) to understand when and how evolutionary dynamics can affect the probability of tipping  
204 responses.

205

206 Such modelling approaches can help to (i) compare how different mechanisms of trait change  
207 (genetic vs plastic) could affect tipping point responses, (ii) identify the conditions (e.g. rate and  
208 pattern of environmental stress, rate of trait evolution, costs and trade-offs) under which trait  
209 evolution will modify collapse and recovery trajectories, or even (iii) test when trait change  
210 itself could be so abrupt (due to disruptive selection) that it could cause ecosystem tipping



211 points. In that way we could develop novel ways for detecting tipping points based on changes  
212 in ecological and trait dynamics (Box 2), and suggest new designs for experimental testing.

213

### 214 ***Adding evolutionary contrasts to experimental tests of ecological tipping points***

215 There are two common approaches for experimentally testing tipping point theory. The first  
216 approach starts by establishing two alternative states of the system on either side of a tipping  
217 point, and then testing how the system responds to pulse perturbations of a state variable. For  
218 example, if there is evidence for a positive feedback (Box 1) in two states with a different  
219 dominant species in each community, then the outcome of species dominance might strongly  
220 depend on the initial density of species (i.e. priority effects) (Fukami and Morin 2003). The  
221 second approach starts with the system in one state, and then applies a press perturbation of  
222 an environmental condition (e.g. increasing productivity, increasing mortality) to observe when  
223 the system transitions to a new state (Dai et al. 2012; Veraart et al. 2012). To test for hysteresis  
224 in the system, the environmental condition can then be reversed while tracking system  
225 recovery to the initial state (Faassen et al. 2015).

226

227 Independently manipulating evolutionary and ecological components of a system can provide  
228 new insights into how the dynamics of trait change can affect tipping points. Several  
229 experiments have been designed to study the interplay between ecological and evolutionary  
230 dynamics (Farkas et al. 2013; Pantel et al. 2015; Williams et al. 2016), and these could be  
231 usefully co-opted to experimentally test predictions from tipping point theory. In an experiment  
232 with freshwater cyanobacteria, light level was manipulated to test for hysteresis associated  
233 with transitions between a high and low biomass state (Faassen et al. 2015). Contrary to  
234 predictions from an ecological model, the population recovered to a higher light stress faster  
235 than expected. In the experiment, the recovering cells had lower pigment concentrations,  
236 possibly reflecting adaptation to high irradiance conditions at a cost of photosynthetic  
237 efficiency at lower light irradiance. This suggests that the presence of trait variation in the  
238 population influenced the nature of the transition between the two states. A useful  
239 experimental test of this idea would be to manipulate standing levels of genetic variation in the

240 stressed population and measure if tipping points change. Adding such evolutionary contrasts  
241 to ecological experiments would be a fruitful way to test how both trait variation and evolution  
242 may affect tipping points. In experimental systems it is possible to isolate the effects of density  
243 (ecological effects) from the effects of heritable trait change (evolutionary effects). Specifically,  
244 one might be able to differentiate between purely ecological effects, direct evolutionary effects  
245 linked to changes in functional effect traits, and density-mediated indirect evolutionary effects  
246 linked to changes in functional response traits (Patel et al. 2016).

247

### 248 **Closing the loop: eco-evolutionary feedbacks and tipping point responses**

249 Reciprocal interactions between ecological and evolutionary dynamics is an old idea (e.g. (David  
250 1968; Levins 1968)) that is increasingly being tested across a range of systems and study  
251 questions (e.g. (Fussmann et al. 2007; Hendry 2017)). Here, we focused on the potential  
252 implications that heritable trait changes can have for ecological tipping points. The next step is  
253 to understand how reciprocal feedbacks between ecological tipping points and evolutionary  
254 dynamics might radically alter not only the dynamics of ecosystems close to tipping but also the  
255 evolution of populations and communities of these ecosystems. Tipping points between  
256 contrasting ecosystem states create different selection regimes that can shape the evolution of  
257 focal species (like keystone, or ecosystem engineers species) and in their turn the dynamics of  
258 the ecosystem state they belong to (Matthews et al. 2015). One possibility is that such selection  
259 regimes will be asymmetric, leading to evolutionary reversals, for example in body sizes in  
260 grazed populations (Dercole et al. 2002), or could maintain the recurrence of harmful algal  
261 blooms in lakes (Driscoll et al. 2016).

262

263 It remains an outstanding challenge to test these ideas along with several new questions (Box  
264 3). Most theoretical work on eco-evolutionary dynamics has been experimentally corroborated  
265 in laboratory experiments with short generation organisms (Yoshida et al. 2003). Similarly,  
266 ecological tipping points have been mostly studied in experimental microcosms at the  
267 population level with single species (Dai et al. 2012; Veraart et al. 2012). Ecosystem scale  
268 tipping points are harder to experimentally test (but see (Carpenter et al. 2011)) and

269 simultaneous information on trait variation of the organisms involved is rarely available. Yet,  
270 ecosystem collapses have evolutionary consequences that may trap an ecosystem in an  
271 undesired state making recovery difficult. Thus, sustaining trait variation may be important not  
272 only for preventing collapse, but also for improving the success of ecological restoration.  
273 Despite the challenging task, the evolutionary perspective we advocate can improve our  
274 understanding and management of ecosystems under stress.

275

### 276 **Acknowledgements**

277 VD and BM are grateful to Eawag and the Adaptation to a Changing Environment Program at  
278 ETH Zurich for financing a workshop on eco-evolutionary dynamics of tipping points held in  
279 Kastanienbaum in 2016. BM acknowledges a SNF 31003A\_175614 grant.

### 280 **Competing interests**

281 We declare no competing interests.

### 282 **Author contributions**

283 VD and BM designed research and wrote the paper with contributions from all authors.

284 **Table 1** Examples of ecosystem tipping points summarizing the organisms involved and the  
 285 potential response and effect traits of these organisms. If these traits can experience  
 286 phenotypic changes, they may affect the tipping point responses in any of the ways presented  
 287 in the text . Response traits are defined as traits that respond to the environmental stressor(s)  
 288 that can invoke a tipping point. Effect traits are defined as traits that may influence an  
 289 ecosystem function that is linked to a tipping point. In the table we refer to the effect of such  
 290 traits rather than the traits themselves.

| Ecosystem Tipping Point     | Organism      | Environmental driver                   | Response trait                                | Effects resulting from change in effect trait      |
|-----------------------------|---------------|----------------------------------------|-----------------------------------------------|----------------------------------------------------|
| lake shift to turbid state  | macrophytes   | nutrient loading                       | growth, morphology                            | nutrient retention, shading, allelopathy           |
|                             | zooplankton   | toxic algae linked to nutrient loading | detoxification                                | grazing on algae                                   |
|                             | phytoplankton | nutrient loading                       | growth, nutrient uptake, light requirement    | shading, toxicity                                  |
| dryland desertification     | shrubs        | aridity                                | water retention                               | facilitation                                       |
|                             |               | fire                                   | fire resistance, recruitment                  | facilitation                                       |
|                             |               | grazing                                | herbivory resistance                          | facilitation                                       |
| coral reefs degradation     | corals        | temperature                            | temperature tolerance                         | habitat structure                                  |
|                             |               | nutrient loading                       | growth/ colonization rate                     | habitat structure                                  |
|                             |               | pathogen disease                       | resistance to pathogens                       | habitat structure                                  |
| salt-marsh mudflats erosion | marsh grasses | inundation                             | colonization rate, below sediment growth rate | habitat structure, sediment retention              |
| intertidal bed degradation  | seagrass      | drought                                | drought resistance                            | habitat structure, sediment retention              |
|                             |               | wave action                            | stem morphology                               | habitat structure, sediment retention, oxygenation |

|                                        |             |                          |                                     |                                          |
|----------------------------------------|-------------|--------------------------|-------------------------------------|------------------------------------------|
|                                        |             | grazing                  | herbivory resistance                | habitat structure,<br>sediment retention |
| plant-pollinator community<br>collapse | pollinators | chemical stress          | toxic resistance                    | pollination                              |
|                                        |             | warming                  | phenology adaptation                | pollination                              |
| kelp forest overgrazing                | kelp        | grazing, wave<br>erosion | herbivory resistance,<br>morphology | habitat structure                        |
| collapse due to Allee effect           | yeast       | salt stress              | reproduction rate                   | growth                                   |

---

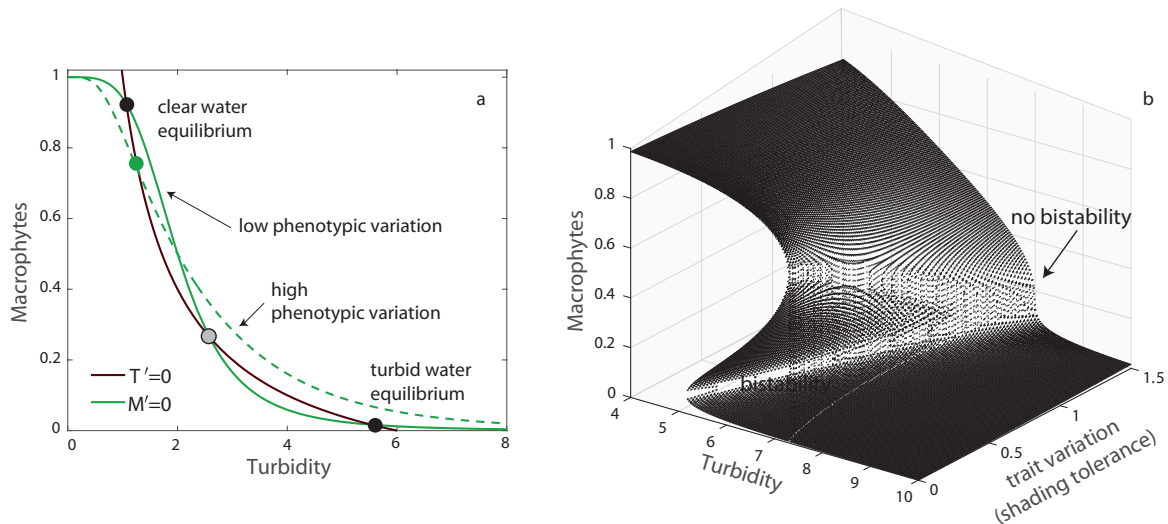

292

293 **Figure 1**

294 Variation in a response trait (eg macrophyte shading tolerance) affects tipping points of shallow

295 lake shifting to a eutrophic turbid state. a) The intersections of macrophyte and turbidity

296 responses ( $M'=0$ ,  $T'=0$  nullclines) mark the equilibria of the system for two levels of trait

297 variation in the shading tolerance of macrophytes. In the absence of variation ( $\sigma^2=0$ ) there

298 are two alternative equilibria (clear water and turbid water state at the crossing of solid green

299 and brown lines). In the presence of variation ( $\sigma^2=0.75$ ), there is only a single equilibrium of

300 clear water state with no tipping points (at the crossing of dashed green and solid brown lines).

301 b) Changing the level of trait variation in the response trait (eg shading tolerance) will affect the

302 response of a shallow lake to environmental stress (turbidity). Under increasing trait variation

303 hysteresis decreases, bistability disappears, and the tipping point turns into a gradual and non-

304 catastrophic response. Although not captured explicitly by this simple model, the effect of trait

305 variation on the ecosystem response could act through the existence of resistant individuals (or

306 subpopulations of macrophytes), but also on its potential to facilitate trait change. Model

307 details and parameters can be found in the Supplementary Information.

308

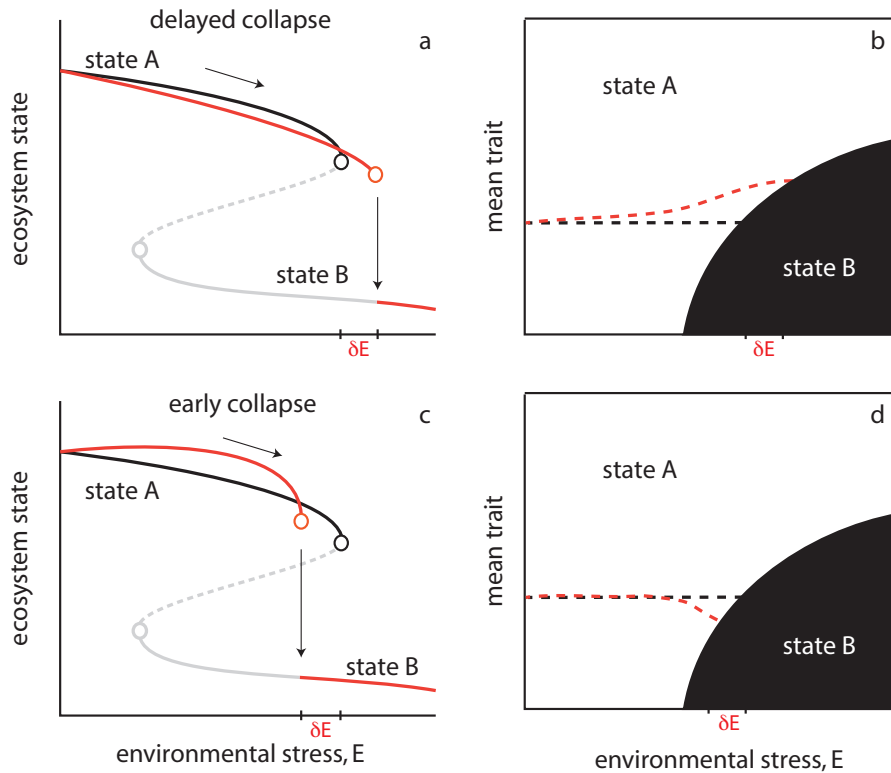

309

310 **Figure 2**

311 Hypothetical alterations of trajectories of ecosystem collapse (left panels, red solid lines) as a

312 consequence of trait change (right panels, red dotted lines). (a, b) Contemporary adaptive

313 mean trait change delays the threshold at which the tipping point occurs ( $\delta E$ ), potentially

314 associated with a cost that decreases the equilibrium ecosystem state. (c, d) Adaptive mean

315 trait changes might in the short term increase the equilibrium ecosystem state while at the

316 same time also induce an early collapse. [(a, c) Black and gray lines represent the two

317 alternative states of the reference model with no phenotypic change, dotted lines mark the

318 unstable boundary between the two states, dots denote tipping points. (b, d) Dotted black line

319 is the reference scenario with no trait change]

320

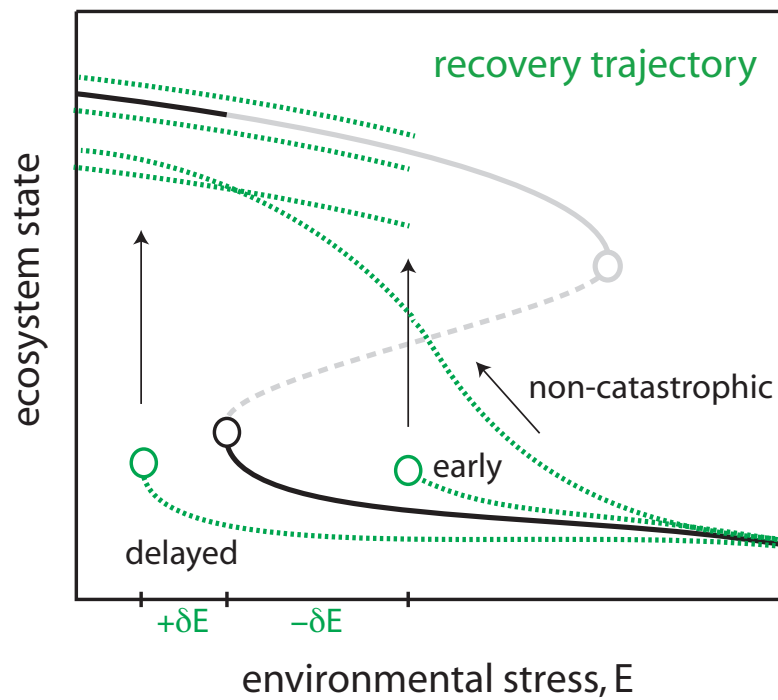

321

322 **Figure 3**

323 Potential consequences of trait change on the recovery trajectories of an ecosystem after  
324 collapse (green dashed lines). Recovery may be delayed or occur earlier affecting the range of  
325 hysteresis and the ease of recovery. In both cases, it is unclear whether the ecosystem shifts  
326 back to exactly the same state as before the collapse. It may be possible that the collapse has  
327 allowed the emergent of a different (new) phenotype that could even turn the recovery path  
328 non-catastrophic. [Solid lines represent the two alternative states of the reference model with  
329 no phenotypic change, dotted lines mark the unstable boundary between the two states, dots  
330 denote tipping points.]

331



332 **Box 1: What is a tipping point?**

333 Tipping points mark the shift between contrasting system states that occur when external  
334 conditions reach thresholds that trigger an accelerating transition to a contrasting new state  
335 (Nes et al. 2016). Mathematically, these transitions correspond to saddle-node or fold  
336 bifurcation points (Strogatz 1994). They are also called catastrophic because they mark an  
337 unexpected and radical change in the equilibrium state of a system. Tipping points can occur at  
338 population level (e.g. due to Allee effects (Dai et al. 2012)) and community level (e.g. due to  
339 trophic cascades (Kitchell and Carpenter 1993)), but it is at the ecosystem scale that tipping  
340 points are most prominently studied because they can incur long-term disruption to vital  
341 ecosystem services (Barnosky et al. 2012) . For example, clear lakes turn turbid dominated by  
342 algal blooms (Scheffer et al. 1993), coral reefs get overgrown by macroalgae (Knowlton 1992),  
343 fisheries collapse due to overexploitation (Beddington and May 1977), and tropical forests shift  
344 to savanna-type ecosystems under high fire intensity (Staver et al. 2011).

345

346 Tipping points are typically observed in systems where strong positive feedbacks drive the  
347 establishment of alternative stable states (Nes et al. 2016). In the case of shallow lakes,  
348 dominance of aquatic macrophytes prevents the growth of algae by removing nutrients  
349 (phosphorus) from the water column that leads to the establishment of a stable clear water  
350 state (Fig I). When phosphorus loading exceeds a critical threshold macrophytes cannot  
351 successfully retain phosphorus, algae start to grow and lake turbidity increases. Rising turbidity  
352 kicks a vicious cycle: it hinders the growth of macrophytes but facilitates algae concentration in  
353 a self-enforced positive feedback loop (less macrophytes => more algae => more turbidity =>  
354 less macrophytes and so on) that leads to the collapse of macrophytes and the establishment of  
355 a contrasting turbid lake state. The same positive feedback loop can lead to the recovery of  
356 macrophytes, but this time at a lower critical level of phosphorus loading, where algae growth  
357 is limited to such an extent that turbidity decreases sufficiently for macrophyte to grow again,  
358 capture the phosphorus and reinforce a positive feedback loop leading back to the clear water  
359 state. Between these two tipping points, the system is bistable meaning that it can be found in  
360 one of the two alternative stable states. This difference in conditions that mark the forward and

361 backward shift is called hysteresis. The stronger the hysteresis, the more difficult it is to recover  
362 an ecosystem back to its previous state.  
363

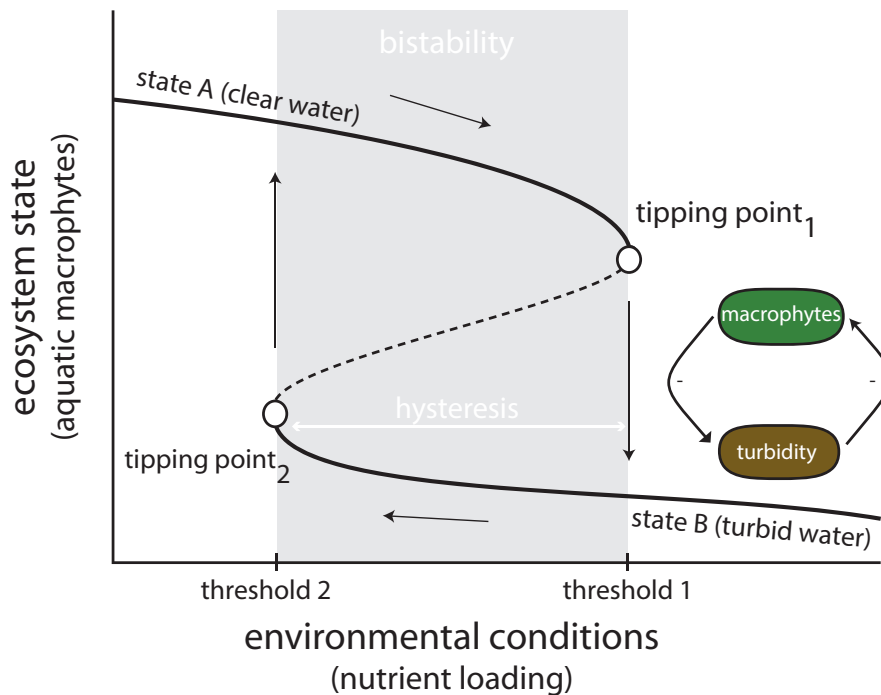

364  
365

366 **Figure 1**

367 Tipping points mark discontinuous changes in the state of an ecosystem. Starting from the  
368 upper branch, the ecosystem follows the stable equilibrium line until conditions cross threshold  
369 1 at which the upper stable equilibrium disappears (tipping point<sub>1</sub>) and the ecosystem state  
370 drops abruptly to the lower (alternative) stable state. In our example of the turbid and clear-  
371 water states of shallow lakes, reducing nutrient conditions - but to a much lower level - leads to  
372 the restoration of the previous state at the crossing of threshold 2 (tipping point<sub>2</sub>). The  
373 difference in the thresholds between the forward and backward tipping points marks the  
374 hysteresis in the system. For this range of conditions the ecosystem can be found in either of  
375 the two alternative stable states (bistability). Along the pathways depicted here, no change in  
376 the traits of the organisms stabilizing the clear-water (macrophytes) or turbid (algae) state is  
377 assumed. [Black lines represent the stable equilibria. Dotted line represents the border  
378 between the basins of attraction of the two alternative stable states.]

379 **Box 2: Detecting tipping points based on ecosystem-state and trait changes**

380 Ecological tipping points are difficult to detect. However, theory suggests that subtle changes in  
381 the dynamics of an ecosystem state can provide early-warning information on the underlying  
382 stability and risk of a tipping response (Scheffer et al. 2009). This risk is typically quantified by  
383 indicators of resilience based on critical-slowing-down (Dakos et al. 2015), and include an  
384 increase in recovery time back to equilibrium after a perturbation, a rise in variance as the state  
385 of the ecosystem fluctuates more widely around its equilibrium, and an increase in  
386 autocorrelation because the state of the ecosystem resembles more and more its previous  
387 state close to a tipping point. These indicators have been empirically tested in laboratory  
388 experiments (Dai et al. 2012; Veraart et al. 2012) and in the field (Carpenter et al. 2011; van  
389 Belzen et al. 2017) focusing on ecosystem state, and neglecting any trait changes. Accounting  
390 for trait change creates new challenges but also opportunities in the detection of tipping points  
391 (Figure II). It is unclear whether trait change can affect the performance of resilience indicators,  
392 or whether indicators based on both ecosystem state and trait state dynamics could  
393 complement each other to improve tipping point detection. Changes in traits have been  
394 suggested as a basis for predicting ecological responses (Enquist et al. 2015), and seeds of this  
395 idea can be found in the suggestion that variation in maturation schedules of cod could have  
396 been used to detect its collapse (Olsen et al. 2004). Recent work has shown that measuring  
397 changes in mean or variance in body size in combination with resilience indicators based on  
398 species abundance could improve warning of protists population collapse (Clements and Ozgul  
399 2016). Nonetheless, slowing down indicators should be expected - at least based on ecological  
400 dynamics - in ecosystems at the edge of tipping points (Ferriere and Legendre 2013). Although  
401 changes in the dynamics of phenotypic adaptation will most likely be context-dependent, it  
402 remains to be tested whether they could be used as signals of potential impending transitions.  
403

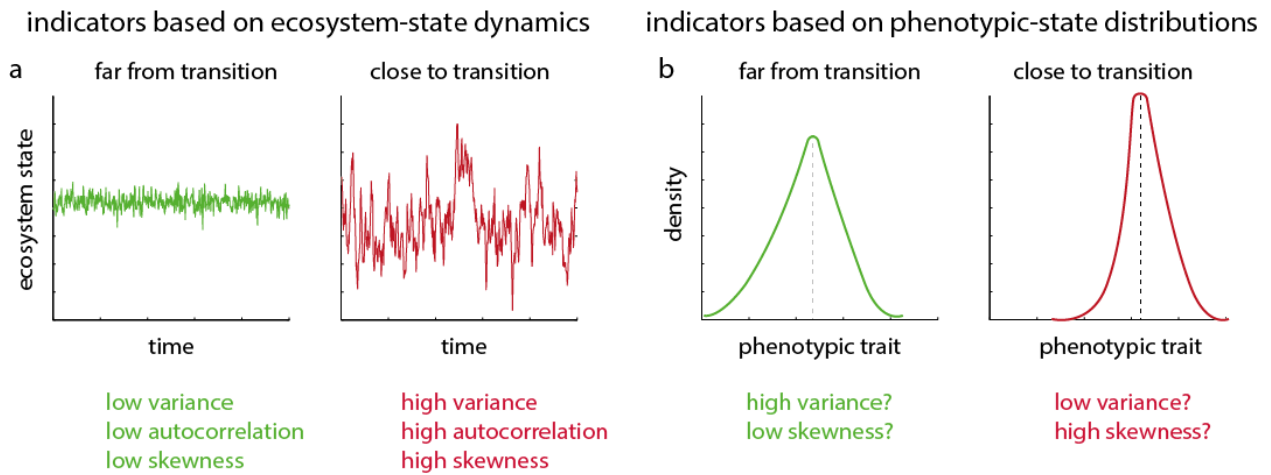

404

405

406 **Figure II**

407 Deriving indicators of resilience for detecting the risk of tipping point responses from changes  
408 in ecosystems dynamics and trait distributions. Close to tipping points, ecological dynamics  
409 become slower in responding to disturbances. This slow recovery leads to a rise in variability  
410 and memory in the dynamics of the monitored ecosystem state that can be used as indicator of  
411 an increased risk of tipping (panel a). Alternatively to such ecosystem-state indicators, temporal  
412 changes or changes along a gradient in trait values of focal species might be also informative for  
413 quantifying the risk of approaching tipping points (panel b). Such trait based indicators may flag  
414 changes even before signals from ecosystem state flare up.

415

416

417 **Box 3: Critical questions for understanding tipping points from an evolutionary perspective**

- 418 - Under which conditions (e.g. type and rate of environmental stress, type of  
419 response/effect trait, level of genetic variation, plasticity, spatial and temporal scales)  
420 does phenotypic change matter the most for ecological tipping points?  
421 - In what ways do genetic vs plastic trait changes affect tipping point responses  
422 differently?  
423 - Do reciprocal interactions between species (e.g. in a network) that influence trait  
424 changes (e.g. through coevolution) affect tipping point responses?  
425 - Is there an intrinsic relationship between trait changes that impact collapse and  
426 recovery, and to what extent can trait changes that impact collapse can be reversed so  
427 as not to impact recovery?  
428 - What type of eco-evolutionary feedbacks develop along the collapse and recovery  
429 trajectories of ecosystems with tipping points?  
430 - Can ecological bistability lead to bistability in trait values (or vice versa)?  
431 - Can we use changes in trait variation as signals of approaching tipping points?  
432 - How can we experimentally study the effects of trait change in ecosystems with tipping  
433 points?  
434 - Can we manage trait variation and evolution to reduce the risk of ecosystem tipping  
435 points?

436

437 **Box 4: Glossary**

438 **Alternative stable states:** contrasting states that a system may converge to under the same  
439 external conditions

440 **Bistability:** the presence of two alternative stable states under the same conditions

441 **Catastrophic bifurcation:** a substantial change in the qualitative state of a system at a threshold  
442 in a parameter or condition

443 **Contemporary (or rapid) evolution:** evolutionary changes that occurs sufficiently rapid that it  
444 can have an impact on ecological dynamics at the same time-scale as other ecological factors

445 **Eco-evolutionary dynamics:** dynamics in which ecological processes influence evolutionary  
446 processes and evolutionary processes influence ecological processes

447 **Effect trait:** a measurable feature of an organism that underlies an organism's direct effect on  
448 an ecosystem function

449 **Genetic drift:** changes in allele frequencies due to random sampling during reproduction

450 **Hysteresis:** the lack of reversibility after a catastrophic bifurcation, meaning that when  
451 conditions change in the opposite direction the system stays in the alternative state unless it  
452 reaches another bifurcation point (different than the one that caused the first shift)

453 **Phenotypic plasticity:** non-heritable changes in the phenotype of an organism

454 **Response trait:** a measurable feature of an organism that underlies an organism's response to  
455 environmental change

456 **Tipping point:** the point where following a perturbation a self-propagated change can  
457 eventually cause a system to shift to a qualitatively different state

458 **Trait variation:** variability of any morphological, physiological, or behavioral feature

459 **Trait evolution:** genetic change in phenotype of a given trait

## References

- Abrams, P. a. 2005. "Adaptive Dynamics" vs. "adaptive dynamics." *Journal of Evolutionary Biology* 18:1162–1165.
- Barnosky, A. D., E. a. Hadly, J. Bascompte, E. L. Berlow, J. H. Brown, M. Fortelius, W. M. Getz, et al. 2012. Approaching a state shift in Earth's biosphere. *Nature* 486:52–58.
- Beddington, J. R., and R. M. May. 1977. Harvesting natural populations in a randomly fluctuating environment. *Science (New York, N.Y.)* 197:463–5.
- Bolnick, D. I., P. Amarasekare, M. S. Araújo, R. Bürger, J. M. Levine, M. Novak, V. H. W. Rudolf, et al. 2011. Why intraspecific trait variation matters in community ecology. *Trends in Ecology & Evolution* 26:183–192.
- Boudsocq, S., A. Niboyet, J. C. Lata, X. Raynaud, N. Loeuille, J. Mathieu, M. Blouin, et al. 2012. Plant Preference for Ammonium versus Nitrate: A Neglected Determinant of Ecosystem Functioning? *The American Naturalist* 180:60–69.
- Carpenter, S. R., J. J. Cole, M. L. Pace, R. Batt, W. A. Brock, T. Cline, J. Coloso, et al. 2011. Early warnings of regime shifts: a whole-ecosystem experiment. *Science (New York, N.Y.)* 332:1079–82.
- Clements, C. F., and A. Ozgul. 2016. Including trait-based early warning signals helps predict population collapse. *Nature Communications* 7:1–8.
- Cortez, M. H. 2011. Comparing the qualitatively different effects rapidly evolving and rapidly induced defences have on predator-prey interactions. *Ecology Letters* 14:202–209.
- Dai, L., D. Vorselen, K. S. Korolev, and J. Gore. 2012. Generic Indicators for Loss of Resilience Before a Tipping Point Leading to Population Collapse. *Science (New York, N.Y.)* 336:1175–1177.
- Dakos, V., S. R. Carpenter, E. H. Van Nes, and M. Scheffer. 2015. Resilience indicators: prospects and limitations for early warnings of regime shifts. *Philosophical Transactions of the Royal Society B-Biological Sciences* 370:20130263.
- David, P. 1968. Population regulation and genetic feedback 159:5.
- De Mazancourt, C., M. Loreau, and L. Abbadie. 1998. Grazing optimization and nutrient cycling: When do herbivores enhance plant production? *Ecology* 79:2242–2252.
- Dercole, F., R. Ferriere, and S. Rinaldi. 2002. Ecological bistability and evolutionary reversals

under asymmetrical competition. *Evolution* 56:1081–1090.

Dieckmann, U., and R. Ferriere. 2004. Adaptive Dynamics and Evolving Biodiversity. Pages 188–224 in D. C. B. Régis Ferrière, Ulf Dieckmann, ed. *Evolutionary Conservation Biology*. Cambridge University Press.

Driscoll, W. W., J. D. Hackett, and R. Ferrière. 2016. Eco-evolutionary feedbacks between private and public goods: Evidence from toxic algal blooms. *Ecology Letters* 19:81–97.

Elmqvist, T., C. Folke, M. Nyström, G. Peterson, J. Bengtsson, B. Walker, and J. Norberg. 2003. Response diversity, ecosystem change, and resilience. *Frontiers in Ecology and the Environment* 1:488–494.

Enquist, B. J., J. Norberg, S. P. Bonser, C. Violle, C. T. Webb, A. Henderson, L. L. Sloat, et al. 2015. *Scaling from Traits to Ecosystems. Trait-Based Ecology - From Structure to Function* (1st ed.). Elsevier Ltd.

Faassen, E. J., A. J. Veraart, E. H. Van Nes, V. Dakos, M. Lürling, and M. Scheffer. 2015. Hysteresis in an experimental phytoplankton population. *Oikos* n/a-n/a.

Farkas, T. E., T. Mononen, A. A. Comeault, I. Hanski, and P. Nosil. 2013. Evolution of camouflage drives rapid ecological change in an insect community. *Current Biology* 23:1835–1843.

Ferriere, R., and S. Legendre. 2013. Eco-evolutionary feedbacks, adaptive dynamics and evolutionary rescue theory. *Philosophical Transactions of the Royal Society B-Biological Sciences* 368:20120081.

Fukami, T., and P. J. Morin. 2003. Productivity-biodiversity relationships depend on the history of community assembly. *Nature* 424:423–426.

Fussmann, G. F., M. Loreau, and P. a. Abrams. 2007. Eco-evolutionary dynamics of communities and ecosystems. *Functional Ecology* 21:465–477.

Gomulkiewicz, R., and R. D. Holt. 1995. When does evolution by natural selection prevent extinction? *Evolution* 49:201–207.

Gravel, D., T. Bell, C. Barbera, T. Bouvier, T. Pommier, P. Venail, and N. Mouquet. 2011. Experimental niche evolution alters the strength of the diversity-productivity relationship. *Nature* 469:89–94.

Hansen, M. M., I. Olivieri, D. M. Waller, and E. E. Nielsen. 2012. Monitoring adaptive genetic



- responses to environmental change. *Molecular Ecology* 21:1311–1329.
- Hendry, A. P. 2017. *Eco-evolutionary Dynamics*. Princeton University Press.
- Kéfi, S., M. van Baalen, M. Rietkerk, and M. Loreau. 2008. Evolution of local facilitation in arid ecosystems. *American Naturalist* 172:E1–E17.
- Kinnison, M. T., and N. G. Hairston. 2007. Eco-evolutionary conservation biology: Contemporary evolution and the dynamics of persistence. *Functional Ecology* 21:444–454.
- Kitchell, J. F., and S. R. Carpenter. 1993. Cascading trophic interactions. Pages 1–14 *in* S. R. Carpenter and J. F. Kitchell, eds. *Cambridge Studies in Ecology: The trophic cascade in lakes*. Cambridge University Press, Cambridge.
- Knowlton, N. 1992. Thresholds and Multiple Stable States in Coral Reef Community Dynamics. *American Zoologist* 32:674–682.
- Levins, R. 1968. Evolution in changing environments: some theoretical explorations. *Monographs in Population Biology*. Princeton University Press, Princeton.
- Loeuille, N., M. Loreau, and R. Ferriere. 2002. Consequences of plant-herbivore coevolution on the dynamics and functioning of ecosystems. *Journal of Theoretical Biology* 217:369–381.
- Matthews, B., L. de Meester, C. G. Jones, B. w. Ibelings, T. J. Bouma, V. Nuutinen, J. van de Koppel, et al. 2015. Under niche construction: an operational bridge between ecology, evolution, and ecosystem science. *Ecological Monographs* 84:245–263.
- Matthews, B., A. Narwani, S. Hausch, E. Nonaka, H. Peter, M. Yamamichi, K. E. Sullam, et al. 2011. Toward an integration of evolutionary biology and ecosystem science. *Ecology Letters* 14:690–701.
- Mori, A. S., T. Furukawa, and T. Sasaki. 2013. Response diversity determines the resilience of ecosystems to environmental change. *Biological Reviews* 88:349–364.
- Murray, G. G. R., A. E. R. Soares, B. J. Novak, N. K. Schaefer, J. A. Cahill, A. J. Baker, J. R. Demboski, et al. 2017. Natural selection shaped the rise and fall of passenger pigeon genomic diversity. *Science* 358:951–954.
- Nei, M. 2007. The new mutation theory of phenotypic evolution. *Proceedings of the National Academy of Sciences* 104:12235–12242.
- Nes, E. H. van, B. M. S. Arani, A. Staal, B. van der Bolt, B. M. Flores, S. Bathiany, M. Scheffer, et

- al. 2016. What Do You Mean, ‘Tipping Point’? *Trends in Ecology & Evolution* 31:319–338.
- Norberg, J., D. P. Swaney, J. Dushoff, J. Lin, R. Casagrandi, and S. A. Levin. 2001. Phenotypic diversity and ecosystem functioning in changing environments: a theoretical framework. *Proceedings of the National Academy of Sciences of the United States of America* 98:11376–81.
- Oliver, T. H., M. S. Heard, N. J. B. Isaac, D. B. Roy, D. Procter, F. Eigenbrod, R. Freckleton, et al. 2015. Biodiversity and Resilience of Ecosystem Functions. *Trends in Ecology & Evolution* 30:673–684.
- Olsen, E. M., M. Heino, G. R. Lilly, M. J. Morgan, J. Bratley, B. Ernande, and U. Dieckmann. 2004. Maturation trends indicative of rapid evolution preceded the collapse of northern cod. *Nature* 428:4–7.
- Ortiz-Barrientos, D., J. Engelstädter, and L. H. Rieseberg. 2016. Recombination Rate Evolution and the Origin of Species. *Trends in Ecology and Evolution* 31:226–236.
- Pantel, J. H., C. Duvivier, and L. De Meester. 2015. Rapid local adaptation mediates zooplankton community assembly in experimental mesocosms. *Ecology Letters* 18:992–1000.
- Patel, S., M. H. Cortez, and S. J. Schreiber. 2016. Partitioning the effects of eco-evolutionary feedbacks on community stability 191:1–29.
- Rankin, D. J., and A. Lopez-Sepulcre. 2005. Can adaptation lead to extinction? *Oikos* 111:616–619.
- Reynolds, J. F., D. M. S. Smith, E. F. Lambin, B. L. Turner, M. Mortimore, S. P. J. Batterbury, T. E. Downing, et al. 2007. Global Desertification: Building a Science for Dryland Development. *Science* 316:847–851.
- Ruel, J. J., and M. P. Ayres. 1999. Jensen’s inequality predicts effects of environmental variation. *Trends in Ecology and Evolution* 14:361–366.
- Saccheri, I., and I. Hanski. 2006. Natural selection and population dynamics. *Trends in Ecology and Evolution* 21:341–347.
- Scheffer, M., J. Bascompte, W. A. Brock, V. Brovkin, S. R. Carpenter, V. Dakos, H. Held, et al. 2009. Early-warning signals for critical transitions. *Nature* 461:53–59.
- Scheffer, M., S. H. Hosper, M. L. Meijer, B. Moss, and E. Jeppesen. 1993. Alternative equilibria in shallow lakes. *Trends in Ecology and Evolution* 8:275–279.

- Schindler, D. E., R. Hilborn, B. Chasco, C. P. Boatright, T. P. Quinn, L. A. Rogers, and M. S. Webster. 2010. Population diversity and the portfolio effect in an exploited species. *Nature* 465:609–612.
- Seehausen, O. 2004. Hybridization and adaptive radiation. *Trends in Ecology and Evolution* 19:198–207.
- Staver, A. C., S. Archibald, and S. A. Levin. 2011. The Global Extent and Determinants of Savanna and Forest as Alternative Biome States. *Science* 334:230–232.
- Strogatz, S. H. 1994. *Nonlinear Dynamics and Chaos with Applications to Physics, Biology, Chemistry and Engineering*. The Advanced Book Program (1st ed.). Perseus Books, Reading.
- van Belzen, J., J. van de Koppel, M. L. Kirwan, D. van der Wal, P. M. J. Herman, V. Dakos, S. K?fi, et al. 2017. Vegetation recovery in tidal marshes reveals critical slowing down under increased inundation. *Nature Communications* 8:15811.
- Vellend, M., and M. A. Geber. 2005. Connections between species diversity and genetic diversity. *Ecology Letters* 8:767–781.
- Veraart, A. J. A. J., E. J. E. J. Faassen, V. Dakos, E. H. E. H. Van Nes, M. Lürling, M. Scheffer, and M. Lurling. 2012. Recovery rates reflect distance to a tipping point in a living system. *Nature* 481:357–9.
- Walsh, M. R., S. B. Munch, S. Chiba, and D. O. Conover. 2006. Maladaptive changes in multiple traits caused by fishing: Impediments to population recovery. *Ecology Letters* 9:142–148.
- Williams, J. L., B. E. Kendall, and J. M. Levine. 2016. Experimental Landscapes. *Science* 353:482–485.
- Yoshida, T., L. E. Jones, S. P. Ellner, G. F. Fussmann, and N. G. H. Jr. 2003. Rapid evolution drives ecological dynamics in a predator – prey system. *Nature* 424:303–306.

## Supplementary Information - Shallow lake eutrophication model

We used a minimal model that describes the dynamics of transition from a clear water state dominated by macrophytes to a turbid water state where macrophytes are practically absent<sup>1</sup>. Such transition occurs at a crossing of a fold bifurcation (tipping point) due to changes in nutrient loading (eutrophication). Below we explain how we analysed the model to highlight the presence of alternative states as function of environmental stress (Box 1), and the effects of standing phenotypic variation (Figure 1).

The model describes the interactions between macrophyte coverage and turbidity of a shallow lake with the following two ordinary differential equations:

$$\frac{dT}{dt} = r_T T \left(1 - \frac{T}{T_o} \frac{h_M}{h_M + M}\right)$$
$$\frac{dM}{dt} = r_M M \left(1 - \frac{M}{K} \left(\frac{h_T^4 + T^4}{h_T^4}\right)\right)$$

where macrophyte cover  $M$  grows logistically with rate  $r_M$  ( $= 0.05$ ) and carrying capacity  $K$  ( $= 1$ ), while it is limited by turbidity following a nonlinear decreasing Hill function defined by the half-saturation  $h_T$  ( $= 2$ ) and exponent  $p$  ( $= 4$ ). Turbidity  $T$  grows with rate  $r_T$  ( $= 0.1$ ) depending on the level of background turbidity  $T_o$  ( $= [2-8]$ ), used as proxy of nutrient loading acting as the environmental stress in our analysis (nutrient loading, Fig I Box I)). Turbidity is negatively affected by the level of macrophyte cover following an inverse Hill function with half-saturation  $h_M$  ( $= 0.2$ ).

Solving for steady state the nullclines of the system are:

$$M' = \frac{h_T^4}{h_T^4 + T^4}$$
$$T' = T_o \frac{h_M}{h_M + M}$$

Their intersections mark the two alternative stable states (clear and turbid state) and the unstable saddle depending on the value of background turbidity  $T_o$  (Fig. 1a). We hypothesize that the half-saturation  $h_T$  that affects the strength of nonlinear response of macrophytes to turbidity is defined by a response trait  $z$  (e.g. capacity to grow under low light

conditionsshading). Different values of  $z$  will thus change the response of macrophytes to turbidity by changes in  $h_T$  (Supplementary Figure 1a). We assumed that trait  $z$  follows a *beta* distribution (closed limits) that we can parameterize in order to define a given mean  $\mu$  ( $=0$ ) and variance  $\sigma^2$ . We further assumed that the half-saturation  $h_T$  depends on the trait  $z$  following  $h_T = h_{T_0} e^{cz}$ , where  $h_{T_0}$  is a background value ( $= 2$ ) and  $c$  a factor ( $=0.5$ ) (Supplementary Figure 1b).

Using this relationship and integrating for different limits of trait  $z$  and levels of variance of the *Beta* distribution, we can calculate the macrophyte equilibrium in the presence of standing phenotypic variation in  $z$  as:

$$M' = \int_{-z}^z \frac{h_T(z)^4}{h_T(z)^4 + T^4} p(z) dz$$

where  $p(z)$  is defined by the *Beta* distribution as explained above within a range of  $z$  ( $= [-2,2]$ ).

We repeat this for a range of turbidity  $T$  values ( $= [0-8]$ ) to estimate the nullcline of macrophytes  $M$  for this range of turbidity  $T$ , and we find the new equilibria states from the cross sections with the turbidity nullcline (Fig. 1a).

We repeat this procedure to estimate all equilibria as a function of environmental conditions ( $T_0$ ) and for different levels of standing phenotypic variation ( $\sigma^2$ ) to construct the two dimensional bifurcation plot of Fig. 1b.

- 1 Scheffer, M. (1998) *Ecology of Shallow Lakes*, (1st edn) Chapman and Hall.

**Supplementary Figure 1** a) Variation in a response trait  $z$  of macrophytes (e.g. shading tolerance) can affect the way macrophytes respond to water turbidity through parameter  $hT$  that determines the response of macrophytes to turbidity ( $M' = \frac{hT^4}{hT^4 + T^4}$ ). b) Two scenarios of high (dashed) and low (solid) variation in the phenotype distribution of the response trait  $z$  ( $\sim \text{Beta}(\mu, \sigma^2)$ ), where parameter  $h_T$  has a positive relationship with the trait (red line).

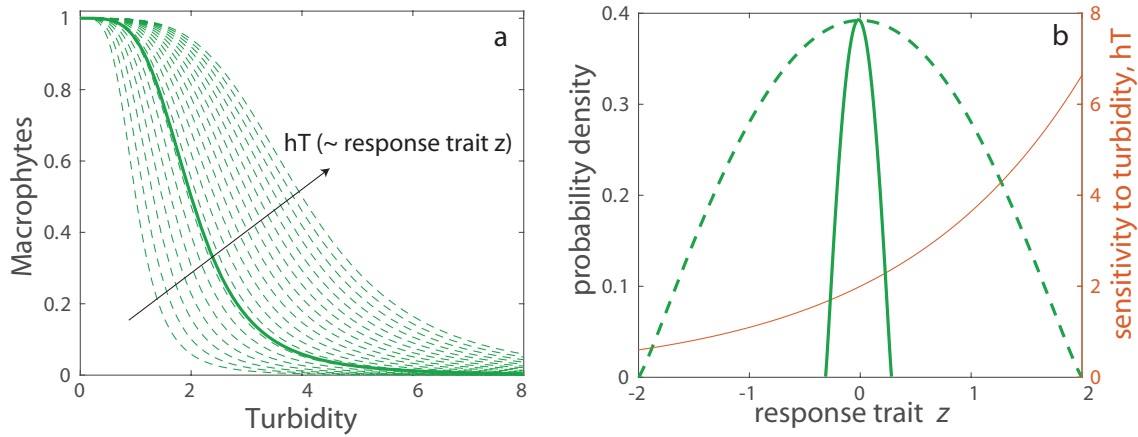

Source: https://www.biorxiv.org/content/10.1101/447227.full.pdf
